# Supplementary material
Source: PubMed Central journal article supplement (PMC6682048)
Supplement: ao9b01574_si_001.pdf [file ao9b01574_si_001.pdf]

## **Supporting Information for:**

### **In Situ Surface-enhanced Raman Spectroscopy Detection of Uranyl Ion with Silver Nanorods Decorated Tape**

Jiaolai Jiang <sup>a\*</sup>, Fengtong Zhao <sup>b</sup>, Siwei Shi <sup>a</sup>, Yunfeng Du<sup>a</sup>, Jun Chen <sup>a</sup>, Shaofei Wang <sup>a</sup>,  
Jingsong Xu <sup>a</sup>, Changmao Li <sup>a</sup>, and Junsheng Liao <sup>a\*</sup>

<sup>a</sup> Institute of Materials, China Academy of Engineering Physics, P. O. Box No.9-11,  
Mianyang, Sichuan, 621907, P. R. China.

<sup>b</sup> Key Laboratory of Advanced Materials (MOE), School of Materials Science and  
Engineering, Tsinghua University, Beijing, 100084, P.R. China.

Corresponding authors : [jjl\\_63147@163.com](mailto:jjl_63147@163.com), [jshliao711@163.com](mailto:jshliao711@163.com).

The supporting information includes: The stability study of the AgNRs SERS tape,  
and the method comparisons for uranyl ion detection .

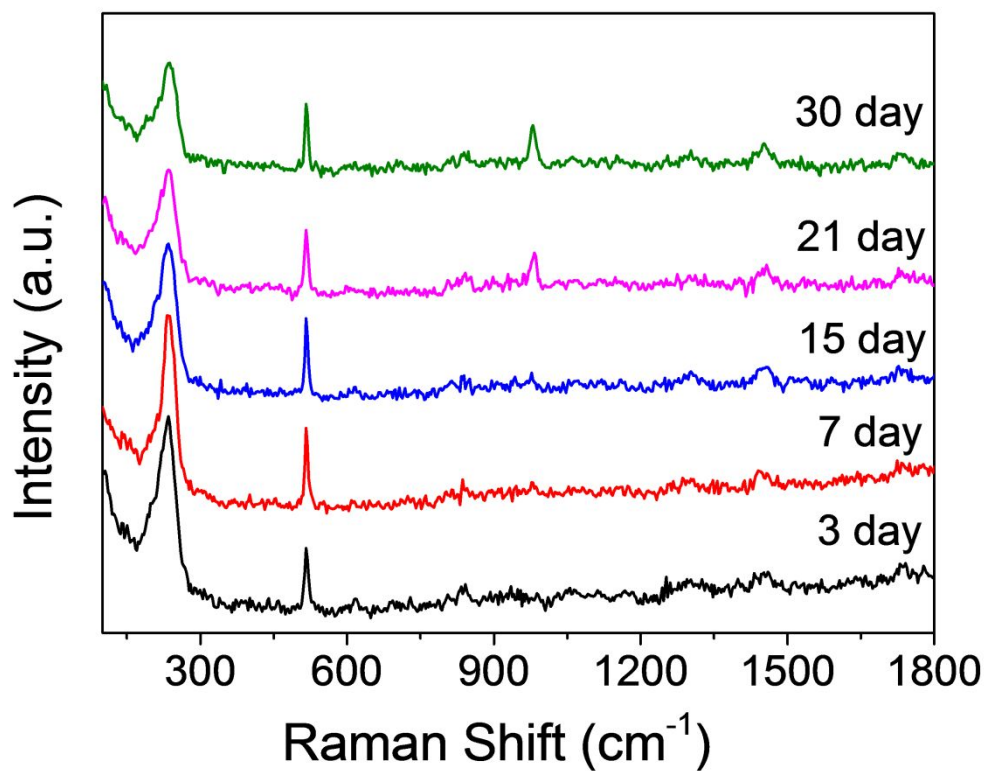

**Figure S1.** the Blank SERS spectra of the AgNRs SERS tape placed in the air within 30 days, showing good air stability (The SERS tape was not peeled off from the silicon). The laser power: 2.5 mW, the exposure time: 1s.

**Table S1.** An overview for uranyl ion detection.

| Materials used       | Method applied   | LOD    | Characters | References |
|----------------------|------------------|--------|------------|------------|
| Gold nanoparitcles   | Photometry       | 500 nM | Ex situ    | [1]        |
| Gold nanoparitcles   | SERS             | 800 nM | Ex situ    | [2]        |
| Silver nanoparticles | SERS             | 58 nM  | Ex situ    | [3]        |
| Silver nanorods      | SERS             | 10 nM  | Ex situ    | [4]        |
| DNAzyme, hairpins    | Electrochemistry | 2 pM   | Ex situ    | [5]        |
| AgNRs SERS tape      | SERS             | 100 nM | In situ    | This paper |

## REFERENCES

1. Liang, Y.; He, Y., Arsenazo III-functionalized gold nanoparticles for photometric determination of uranyl ion. *Microchim. Acta* **2016**, *183* (1), 407-413.
2. Ruan, C.; Luo, W.; Wang, W.; Gu, B., Surface-enhanced Raman spectroscopy for uranium detection and analysis in environmental samples. *Anal. Chim. Acta* **2007**, *605* (1), 80-86.
3. Bhandari, D.; Wells, S. M.; Retterer, S. T.; Sepaniak, M. J., Characterization and detection of uranyl ion sorption on silver surfaces using surface enhanced Raman spectroscopy. *Anal. Chem.* **2009**, *81* (19), 8061-8067.
4. Leverette, C. L.; Villa-Aleman, E.; Jokela, S.; Zhang, Z.; Liu, Y.; Zhao, Y.; Smith, S. A., Trace detection and differentiation of uranyl(VI) ion cast films utilizing aligned Ag nanorod SERS substrates. *Vib. Spectrosc* **2009**, *50* (1), 143-151.
5. Yun, W.; Cai, D.; Jiang, J.; Wang, X.; Liao, J.; Zhang, P.; Sang, G., An ultrasensitive electrochemical biosensor for uranyl detection based on DNAzyme and target-catalyzed hairpin assembly. *Microchim. Acta* **2016**, *183* (4), 1425-1432.
